# Supplementary material for: Hydrogen-Bonding Interactions in T-2 Toxin Studied Using Solution and Solid-State NMR
Source: Toxins (Basel). 2011 Oct 21;3(10):1310–31. doi: 10.3390/toxins3101310 (PMC3210463; doi:10.3390/toxins3101310)
Supplement: Supplementary File 1: — PDF-Document (PDF, 756 KB) [file toxins-03-01310-s001.pdf]

## Supplementary Information

**Praveen Chaudhary**<sup>1,†</sup>, **Roxanne A. Shank**<sup>1,2,†</sup>, **Tony Montana**<sup>1</sup>, **James T. Goettel**<sup>1</sup>,  
**Nora A. Foroud**<sup>2</sup>, **Paul Hazendonk**<sup>1,\*</sup> and **François Eudes**<sup>2,\*</sup>

<sup>1</sup> Department of Chemistry and Biochemistry, University of Lethbridge, 4401 University Drive West, Lethbridge AB T1K 3M4, Canada; E-Mails: praveen.chaudhary@uleth.ca (P.C.); shankr2@uleth.ca (R.A.S.); tony.montina@uleth.ca (T.M.); james.goettel@uleth.ca (J.T.G.);

<sup>2</sup> Lethbridge Research Centre, Agriculture and Agri-Food Canada, 5403-1st Avenue South, Lethbridge AB T1J 4B1, Canada; E-Mail: nora.foroud@agr.gc.ca

† These authors contributed equally to the work.

\* Authors to whom correspondence should be addressed; E-Mails: paul.hazendonk@uleth.ca (P.H.); francois.eudes@agr.gc.ca (F.E.); Tel.: +1-403-329-2657 (P.H.); +1-403-317-3338 (F.E.); Fax: +1-403-329-2057 (P.H.); +1-403-382-3156 (F.E.).

*Received: 19 August 2011; in revised form: 28 September 2011 / Accepted: 11 October 2011 /*

*Published: 21 October 2011*

---

**Abstract:** The structure of T-2 toxin in the solid-state is limited to X-ray crystallographic studies, which lack sufficient resolution to provide direct evidence for hydrogen-bonding interactions. Furthermore, its solution-structure, despite extensive Nuclear Magnetic Resonance (NMR) studies, has provided little insight into its hydrogen-bonding behavior, thus far. Hydrogen-bonding interactions are often an important part of biological activity. In order to study these interactions, the structure of T-2 toxin was compared in both the solution- and solid-state using NMR Spectroscopy. It was determined that the solution- and solid-state structure differ dramatically, as indicated by differences in their carbon chemical shifts, these observations are further supported by solution proton spectral parameters and exchange behavior. The slow chemical exchange process and cross-relaxation dynamics with water observed between the hydroxyl hydrogen on C-3 and water supports the existence of a preferential hydrogen bonding interaction on the opposite side of the molecule from the epoxide ring, which is known to be essential for trichothecene toxicity. This result implies that these hydrogen-bonding interactions could play an important role in the biological function of T-2 toxin and posits towards a possible interaction for the trichothecene class of toxins and the ribosome. These findings clearly illustrate the importance of utilizing solid-state NMR for the study of biological compounds, and suggest that a more detailed study of this whole class of toxins, namely trichothecenes, should be pursued using this methodology.

**Keywords:** T-2 toxin; trichothecene; NMR; hydrogen-bonding; ribosome; toxin; epoxide; water bridging; deuterium exchange; chemical exchange

**Table S1.**  $^1\text{H}$  Chemical Shifts of T-2 Toxin in  $\text{CDCl}_3$ .

| Label           | Chemical Shift (ppm) | Frequency (Hz)       | J partners (Spectral Analysis)           | COSY                                  | NOESY                                                              |
|-----------------|----------------------|----------------------|------------------------------------------|---------------------------------------|--------------------------------------------------------------------|
| 2               | $3.681 (10^{-5})^1$  | $1104.417 (0.003)^1$ | 3, $3_{\text{OH}}$ 14                    | $3, 3_{\text{OH}}, 14$                | $3, 13_{\text{B}}$                                                 |
| 3               | $4.160 (10^{-5})$    | $1248.079 (0.003)$   | $2, 3_{\text{OH}}, 4, 13_{\text{A}}, 14$ | $2, 3_{\text{OH}}, 4$                 | $2, 3_{\text{OH}}, 4, \text{H}_2\text{O}$                          |
| $3_{\text{OH}}$ | $3.100 (10^{-5})$    | $930.117 (0.003)$    | 2, 3, 4                                  | 2, 3                                  | $3, 4, 11, \text{H}_2\text{O}$                                     |
| 4               | $5.348 (10^{-5})$    | $1604.452 (0.003)$   | $3, 3_{\text{OH}}, 14, 13_{\text{B}}$    | $3, 9', 13_{\text{B}}, 14$            | $3, 3_{\text{OH}}, 11, 14, 15_{\text{AB}}, 9', \text{H}_2\text{O}$ |
| $7_{\alpha}$    | $1.886^2 (10^{-5})$  | $565.959 (0.003)$    | $7_{\beta}, 8, 11$                       | $7_{\beta}, 8, 11$                    | $7_{\beta}, 8, 14$                                                 |
| $7_{\beta}$     | $2.408^2 (10^{-5})$  | $722.688 (0.003)$    | $7_{\alpha}, 8, 15_{\text{B}}$           | $7_{\alpha}, 8, 15_{\text{B}}$        | $7_{\alpha}, 8, 13_{\text{A}}$                                     |
| 8               | $5.298 (10^{-5})$    | $1591.419 (0.003)$   | $7_{\alpha\beta}, 10, 16$                | $7_{\alpha\beta}, 10, 16$             | $7_{\alpha\beta}, 16, 2'$                                          |
| 10              | $5.818 (10^{-5})$    | $1741.845 (0.003)$   | 8, 11, 16                                | 8, 11, 16                             | 11, 16                                                             |
| 11              | $4.355 (10^{-5})$    | $1310.316 (0.003)$   | $7_{\alpha}, 10, 15_{\text{B}}, 16$      | $7_{\alpha}, 10, 16$                  | $3_{\text{OH}}, 4, 10, \text{H}_2\text{O}$                         |
| $13_{\text{A}}$ | $2.809^2 (10^{-5})$  | $837.234 (0.003)$    | $3, 13_{\text{B}}$                       | $13_{\text{B}}, 14$                   | $7_{\beta}, 13_{\text{B}}, 14$                                     |
| $13_{\text{B}}$ | $3.046^2 (10^{-5})$  | $914.074 (0.003)$    | $4, 13_{\text{A}}$                       | $4, 13_{\text{A}}, 14$                | $2, 13_{\text{A}}$                                                 |
| 14              | $0.817 (10^{-5})$    | $242.706 (0.002)$    | 2, 4                                     | $2, 4, 13_{\text{AB}}, 15_{\text{A}}$ | $4, 7_{\alpha}, 13_{\text{A}}, 15_{\text{A}}$                      |
| $15_{\text{A}}$ | $4.293^2 (10^{-5})$  | $1220.756 (0.003)$   | $15_{\text{B}}$                          | $14, 15_{\text{B}}, 7'$               | $4, 15_{\text{B}}$                                                 |
| $15_{\text{B}}$ | $4.066^2 (10^{-5})$  | $1292.338 (0.003)$   | $15_{\text{A}}, 7_{\beta}, 11$           | $7_{\beta}, 7', 15_{\text{A}}$        | $4, 15_{\text{A}}$                                                 |
| 16              | $1.748 (10^{-5})$    | $524.420 (0.002)$    | 8, 10, 11                                | 8, 10, 11                             | 8, 10                                                              |

<sup>1</sup> Standard Deviation from spectral analysis using Spin Works [41].

<sup>2</sup> Labelling convention as taken from Savard and Blackwell, Can.J.Chem (1987) [42].

**Table S2.**  $^1\text{H}$  Coupling Constants of T-2 Toxin in  $\text{CDCl}_3$  determined through simulations performed with SpinWorks 3.1.6.

| Label                       | Coupling (Hz)     | Comment/Assignment  |
|-----------------------------|-------------------|---------------------|
| $^3\text{J}_{2,3}$          | $4.946 (0.005)^1$ | 2 is gauche to 3    |
| $^4\text{J}_{2,3\text{OH}}$ | $-0.294 (0.005)$  |                     |
| $^4\text{J}_{2,14}$         | $-0.304 (0.004)$  |                     |
| $^3\text{J}_{3,3\text{OH}}$ | $2.909 (0.005)$   | 3 is gauche to 3-OH |
| $^3\text{J}_{3,4}$          | $2.885 (0.005)$   | 3 is gauche to 4    |
| $^5\text{J}_{3,13\text{A}}$ | $0.211 (0.005)$   |                     |
| $^5\text{J}_{4,13\text{B}}$ | $0.160 (0.005)$   |                     |
| $^4\text{J}_{3\text{OH},4}$ | $-0.293 (0.005)$  |                     |

|                        |                 |                                           |
|------------------------|-----------------|-------------------------------------------|
| $^4J_{4,14}$           | -0.277 (0.003)  |                                           |
| $^2J_{7\alpha,7\beta}$ | -15.015 (0.006) | Geminal coupling typical of $sp^3$ carbon |
| $^3J_{7\alpha,8}$      | 1.248 (0.006)   | $7_\alpha$ nearly perpendicular to 8      |
| $^4J_{7\alpha,11}$     | -1.598 (0.006)  | W configuration                           |
| $^3J_{7\beta,8}$       | 5.718 (0.006)   | $7_\beta$ is gauche to 8                  |
| $^4J_{7\beta,15B}$     | -0.446 (0.006)  | W configuration in one rotamer            |
| $^4J_{8,10}$           | -0.979 (0.006)  | Typical of H on $sp^2$ carbon             |
| $^4J_{8,16}$           | -0.700 (0.003)  | Indicative of rigidity of ring            |
| $^3J_{10,11}$          | 5.892 (0.006)   | 10 is gauche to 11                        |
| $^4J_{10,16}$          | -1.451 (0.003)  | Typical of H and $CH_3$ on $sp^2$ carbon  |
| $^4J_{11,15B}$         | -0.588 (0.006)  | W configuration in one rotamer            |
| $^5J_{11,16}$          | 0.739 (0.003)   | Typical of $CH_3$ on $sp^2$ carbon        |
| $^2J_{13A,13B}$        | 3.971 (0.005)   | Geminal coupling indicating ring strain   |
| $^2J_{15A,15B}$        | -12.835 (0.006) | Geminal coupling typical of $sp^3$ carbon |

<sup>1</sup> Standard Deviation from spectral analysis using Spin Works [41].

**Table S3.**  $^1H$  Chemical Shifts of Side-Chain Groups on T-2 Toxin in  $CDCl_3$ .

| Label  | Chemical Shift (ppm)        | Frequency (Hz)             |
|--------|-----------------------------|----------------------------|
| $2'_A$ | 2.154 (0.0002) <sup>1</sup> | 646.21 (0.06) <sup>1</sup> |
| $2'_B$ | 2.159 (0.0002)              | 647.78 (0.06)              |
| $3'$   | 2.107 (0.0003)              | 631.99 (0.08)              |
| $4'$   | 0.970 (0.0002)              | 290.97 (0.05)              |
| $5'$   | 0.961 (0.0002)              | 288.38 (0.05)              |
| $7'$   | 2.041 (0.0001)              | 612.30 (0.02)              |
| $9'$   | 2.151 (0.0001)              | 645.22 (0.02)              |

<sup>1</sup> Standard Deviation from spectral analysis using Spin Works [41].

**Table S4.**  $^1H$  Coupling Constants of Side-Chain Groups on T-2 Toxin in  $CDCl_3$

| Label           | Coupling (Hz)              | Comment/Assignment                        |
|-----------------|----------------------------|-------------------------------------------|
| $^2J_{2'A,2'B}$ | -14.03 (0.10) <sup>1</sup> | Typical geminal coupling of $sp^3$ carbon |
| $^3J_{2'A,3'}$  | 7.33 (0.10)                | Rotationally averaged                     |
| $^3J_{2'B,3'}$  | 7.56 (0.10)                | Rotationally averaged                     |
| $^3J_{3',4'}$   | 6.77 (0.10)                | Rotationally averaged                     |
| $^3J_{3',5'}$   | 6.61 (0.10)                | Rotationally averaged                     |

<sup>1</sup> Standard Deviation from spectral analysis using Spin Works [41].

**Figure S1.**  $^{13}\text{C}$  to  $^1\text{H}$  HSQC in  $\text{CDCl}_3$ .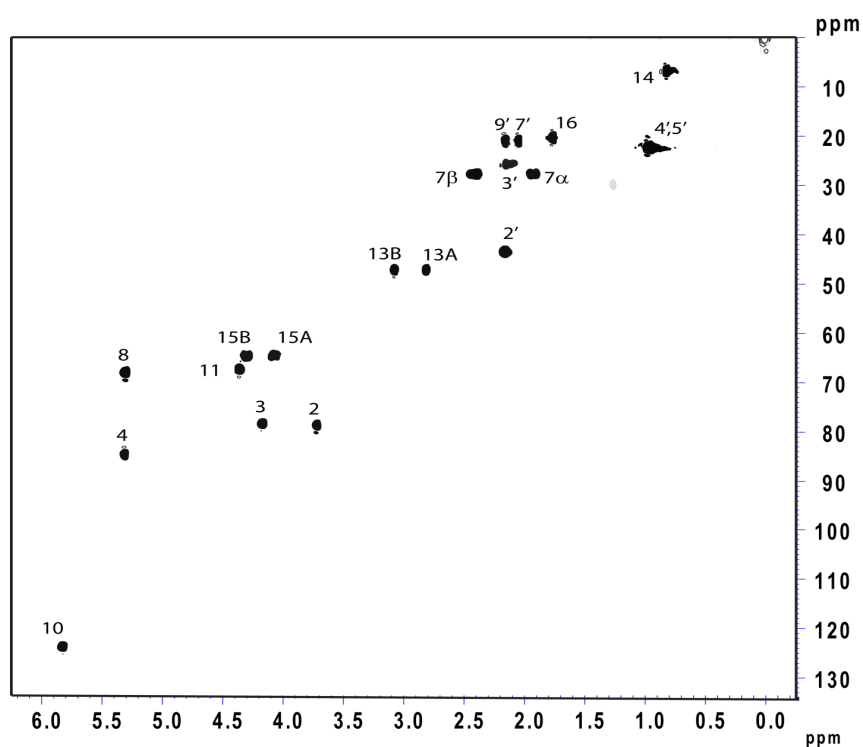**Figure S2.**  $^{13}\text{C}$  to  $^1\text{H}$  HMBC in  $\text{CDCl}_3$ .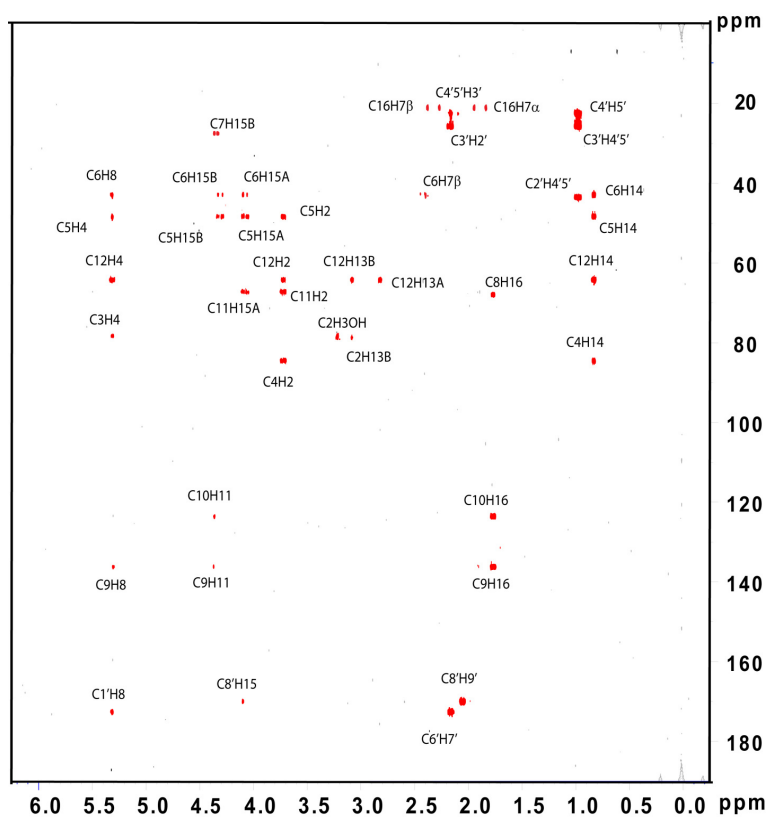

**Table S5.**  $^{13}\text{C}$  Chemical Shifts.

| Label | Solution<br>(ppm) | HSQC             | HMBC                                     | Solid 1<br>(ppm) | Solid 2<br>(ppm) |
|-------|-------------------|------------------|------------------------------------------|------------------|------------------|
| 2     | 78.72             | 2                | 3 <sub>OH</sub> , 13 <sub>B</sub>        | 81.25            | 83.59            |
| 3     | 78.40             | 3                | 4                                        | 77.94            | 80.57            |
| 4     | 84.60             | 4                | 2, 14                                    | 81.6             | 84.7             |
| 5     | 48.39             |                  | 2, 4, 14, 15 <sub>AB</sub>               | 46.8             | 46.8             |
| 6     | 42.94             |                  | 7 <sub>B</sub> , 8, 14, 15 <sub>AB</sub> | 46.1             | 46.1             |
| 7     | 27.75             | 7 <sub>αβ</sub>  | 15 <sub>B</sub>                          | 28.32            | 29.49            |
| 8     | 68.02             | 8                | 16                                       | 69.07            | 69.73            |
| 9     | 136.32            |                  | 8, 11, 16                                | 137.15           | 139.2            |
| 10    | 123.70            | 10               | 11, 16                                   | 125.03           | 126.82           |
| 11    | 67.34             | 11               | 2, 15 <sub>A</sub>                       | 69.45            | 71.15            |
| 12    | 64.59             |                  | 2, 4, 13 <sub>AB</sub> , 14              | 66.36            | 71.86            |
| 13    | 47.21             | 13 <sub>AB</sub> |                                          | 45.33            | 46.56            |
| 14    | 6.88              | 14               |                                          | 9.51             | 8.73             |
| 15    | 64.31             | 15 <sub>AB</sub> |                                          | 66.85            | 68.9             |
| 16    | 20.35             | 16               | 7 <sub>αβ</sub>                          | 22.19            | 22.19            |
| 1'    | 172.73            |                  | 8                                        | 173.71           | 173.9            |
| 2'    | 43.58             | 2'               | 4', 5'                                   | 49.00            | 51.30            |
| 3'    | 25.78             | 3'               | 2', 4', 5'                               | 27.22            | 29.02            |
| 4'    | 22.37             | 4'               | 3', 5'                                   | 23.87            | 25.18            |
| 5'    | 22.45             | 5'               | 3'                                       | 25.73            | 26.29            |
| 6'    | 170.13            |                  | 7'                                       | 171.74           | 172              |
| 7'    | 21.07             | 7'               |                                          | 22.53            | 22.76            |
| 8'    | 172.70            |                  | 15, 9'                                   | 172              | 172.44           |
| 9'    | 21.04             | 9'               |                                          | 22.76            | 23.47            |

**Figure S3.** Crystal Structure of T-2 Toxin of conformations 1 and 2 in the unit cell. Top view (top) and Bottom view (bottom).

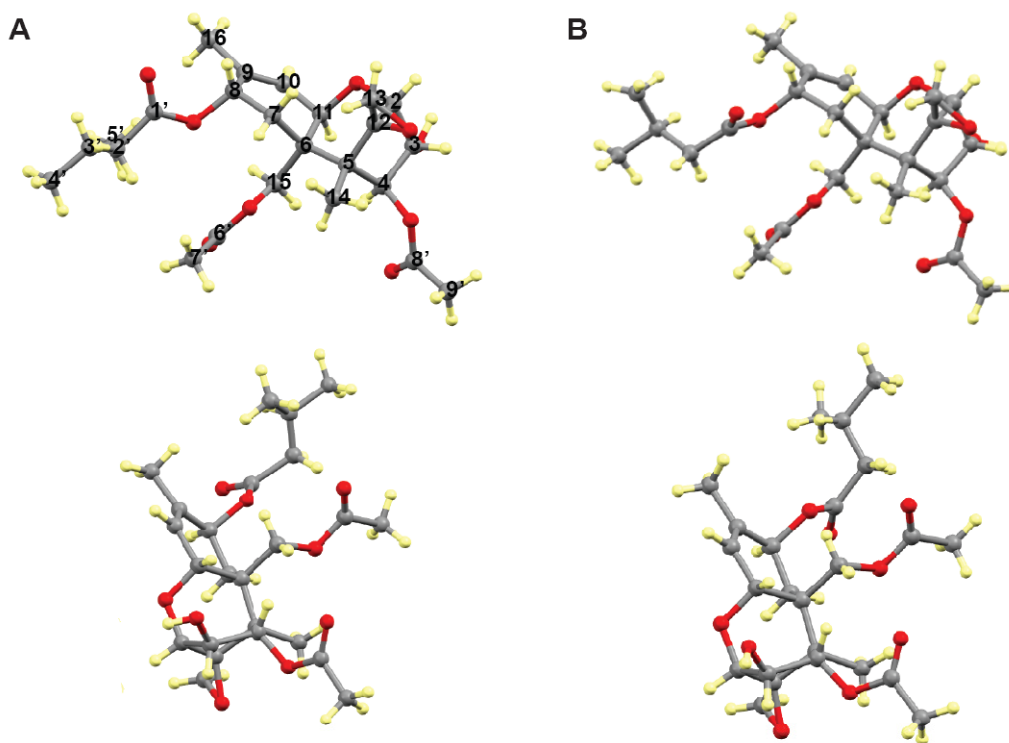

**Table S6.** Close contact in T-2 Toxin X-ray Structure.

| ATOM1                 | ATOM2                 | Length | Carbons   | Carbons   | Type   |
|-----------------------|-----------------------|--------|-----------|-----------|--------|
| O-12(1)               | H-3 <sub>OH</sub> (2) | 1.88   | C-12,C-13 | C-3       | H-bond |
| H-3 <sub>OH</sub> (1) | O-1(2)                | 2.203  | C-3       | C-2,C-11  | H-bond |
| H-3 <sub>OH</sub> (1) | O-3(2)                | 2.299  | C-3       | C-3       | H-bond |
| H-16(1)               | H-5'(2)               | 2.32   | C-16      | C-5'      | VDW    |
| H-5'(1)               | H-2' <sub>A</sub> (2) | 2.335  | C-5'      | C-2'      | VDW    |
| H-13 <sub>B</sub> (1) | H-15 <sub>A</sub> (2) | 2.367  | C-13      | C-15      | DP     |
| H-14(1)               | H-3 <sub>OH</sub> (2) | 2.384  | C-14      | C-3       | DP     |
| H-14(1)               | H-9'(2)               | 2.399  | C-14      | C-8',C-9' | VDW/DP |
| O-3(1)                | H-8(1)                | 2.512  | C-3       | C-1',C-8  | DP     |
| H-11(1)               | O-1'(1)               | 2.577  | C-11      | C-1',C-2' | DP     |
| O-8'(1)               | H-7'(2)               | 2.588  | C-8',C-9' | C-6',C-7' | DP     |
| H-7'(1)               | O-6'(2)               | 2.593  | C-7',C-6' | C-6',C-7' | DP     |
| H-9'(2)               | O-8'(2)               | 2.595  | C-9',C-8' | C-8',C-9' | DP     |
| H-9'(1)               | O-4(2)                | 2.666  | C-9',C-8' | C-4',C-8' | DP     |
| H-3(1)                | O-3(2)                | 2.679  | C-3       | C-3       | H-bond |
| H-13 <sub>B</sub> (2) | O-6'(2)               | 2.704  | C-12,C-13 | C-6',C-7' | DP     |
| O-12(1)               | O-3(2)                | 2.737  | C-12,C-13 | C-3       | H-bond |

|                       |                       |       |           |          |        |
|-----------------------|-----------------------|-------|-----------|----------|--------|
| H-3 <sub>OH</sub> (1) | C-11(2)               | 2.754 | C-3       | C-11     | H-bond |
| C-6'(1)               | H-7'(2)               | 2.76  | C6',C7'   | C6',C7'  | DP     |
| C-13(1)               | H-3 <sub>OH</sub> (2) | 2.763 | C-12,C-13 | C-3      | H-bond |
| C-13(1)               | H-15 <sub>A</sub> (2) | 2.835 | C-13      | C-15     | DP     |
| O-3(1)                | O-1(2)                | 2.89  | C-3       | C-2,C-11 | H-bond |
| O-3(1)                | O-3(2)                | 2.968 | C-3       | C-3      | H-bond |
| C-3(1)                | O-3(2)                | 3.159 | C3        | C3       | H-bond |
